# Supplementary material for: Economics of abortion: a scoping review protocol
Source: PubMed Central journal article supplement — BMJ Open. 2019 Jul 30;9(7):e029939. doi: 10.1136/bmjopen-2019-029939 (PMC6678010; doi:10.1136/bmjopen-2019-029939), 2019-07-30
Supplement: bmjopen-2019-029939supp001.pdf [file bmjopen-2019-029939supp001.pdf]

| <b>Reviewer</b>     | <b>Study ID</b>                                        | <b>Author</b>          | <b>Study Name</b>                            |
|---------------------|--------------------------------------------------------|------------------------|----------------------------------------------|
| Reviewer's initials | Number assigned to each article/study (e.g., 001, 002) | First author's surname | Write the full name of the study or article. |

|                         | State the exclusion<br>criteria for the<br>study, or state<br>"none." | State the inclusion<br>criteria for the<br>study. | Type of<br>publication<br><b>Publication<br/>Type\$1</b> | If PubTyp = 3, give<br>details.<br><b>Publication<br/>Type\$2</b> |
|-------------------------|-----------------------------------------------------------------------|---------------------------------------------------|----------------------------------------------------------|-------------------------------------------------------------------|
| Year of publication     | "none."                                                               |                                                   |                                                          |                                                                   |
| <b>Publication Date</b> | <b>Exclusion Criteria</b>                                             | <b>Inclusion Criteria</b>                         | <b>Type\$1</b>                                           | <b>Type\$2</b>                                                    |

| Detail any other publications linked to the study (e.g. papers describing methods, additional analyses) | Assumed sex of the first author based on first name | Language of Publication | Language of Publication        | List all countries in which the study was conducted | Country(ies) income group   |
|---------------------------------------------------------------------------------------------------------|-----------------------------------------------------|-------------------------|--------------------------------|-----------------------------------------------------|-----------------------------|
| <b>Other Publications</b>                                                                               | <b>First Author's Sex</b>                           | <b>Publication</b>      | <b>Language of Publication</b> | <b>Country</b>                                      | <b>Country Income Group</b> |

|                     |                                                            |                                                  | Give specific detail for previous response (e.g. Santillana district (17 villages, 6158 inhabitants). Provide name if only one location unit. | What was the main identifying characteristic of the population/group/stratum targeted? |
|---------------------|------------------------------------------------------------|--------------------------------------------------|-----------------------------------------------------------------------------------------------------------------------------------------------|----------------------------------------------------------------------------------------|
| World region(s)     | State the primary or main objective(s)/aim(s) of the study | At which geographical level did the study occur? | <b>Geographic Level\$2</b>                                                                                                                    | <b>Study Population\$1</b>                                                             |
| <b>World Region</b> | <b>Study Objective</b>                                     | <b>Geographic Level\$1</b>                       | <b>Geographic Level\$2</b>                                                                                                                    | <b>Study Population\$1</b>                                                             |

|                                                                                                                                                |                                                                       |                                                                                                                |                                                                                                                                             |                                                                          |
|------------------------------------------------------------------------------------------------------------------------------------------------|-----------------------------------------------------------------------|----------------------------------------------------------------------------------------------------------------|---------------------------------------------------------------------------------------------------------------------------------------------|--------------------------------------------------------------------------|
| Give specific detail for previous response (e.g., Hispanic American; urban poor; Muslim population). Use author's words (with quotation marks) | Did the study report on the outcome 'costs of abortion-related care?' | At which level(s) did the study report on the outcome 'costs of abortion-related care': micro, meso, or macro? | In the author's words, include the text describing the definition and/or methodology used for the outcome 'costs of abortion-related care.' | Report, by level, all outcome data for 'costs of abortion-related care.' |
| <b>Study</b>                                                                                                                                   | <b>Critical</b>                                                       | <b>Critical</b>                                                                                                | <b>Critical</b>                                                                                                                             | <b>Critical</b>                                                          |
| <b>Population\$2</b>                                                                                                                           | <b>Outcome\$1A</b>                                                    | <b>Outcome\$1B</b>                                                                                             | <b>Outcome\$1C</b>                                                                                                                          | <b>Outcome\$1D</b>                                                       |

|                                                                                                                   |                                                                                                           |                                                                                                       |                                                    |                                                                                                                                 |
|-------------------------------------------------------------------------------------------------------------------|-----------------------------------------------------------------------------------------------------------|-------------------------------------------------------------------------------------------------------|----------------------------------------------------|---------------------------------------------------------------------------------------------------------------------------------|
| on the outcome<br>'economic impacts<br>of abortion-related<br>care?'                                              | At which level(s)<br>did the study                                                                        | In the author's<br>words, include the<br>text describing the<br>definition and/or<br>methodology used | Report, by level, all<br>outcome data for          | report on the<br>outcome 'economic<br>benefits of abortion-<br>related care?'                                                   |
| <i>'Economic impacts'<br/>refer to the<br/>economic effect or<br/>influence of<br/>abortion-related<br/>care.</i> | report on the<br>outcome 'economic<br>impacts of abortion-<br>related care':<br>micro, meso, or<br>macro? | for the outcome<br>'economic impacts<br>of abortion-<br>related care.'                                | 'economic impacts of<br>abortion-related<br>care.' | <i>'Economic benefits'<br/>refer to the<br/>advantages or<br/>profits gained from<br/>receiving abortion-<br/>related care.</i> |
| <b>Critical<br/>Outcome\$2A</b>                                                                                   | <b>Critical<br/>Outcome\$2B</b>                                                                           | <b>Critical<br/>Outcome\$2C</b>                                                                       | <b>Critical Outcome\$2D</b>                        | <b>Critical<br/>Outcome\$3A</b>                                                                                                 |

|                                                                                                                            |                                                                                                                                                         |                                                                           |                                                                                                                                                                  |                                                                                                                |
|----------------------------------------------------------------------------------------------------------------------------|---------------------------------------------------------------------------------------------------------------------------------------------------------|---------------------------------------------------------------------------|------------------------------------------------------------------------------------------------------------------------------------------------------------------|----------------------------------------------------------------------------------------------------------------|
| At which level(s) did the study report on the outcome 'economic benefits of abortion-related care': micro, meso, or macro? | In the author's words, include the text describing the definition and/or methodology used for the outcome 'economic benefits of abortion-related care.' | Report all outcome data for 'economic benefits of abortion-related care.' | report on the outcome 'value of abortion-related care?'<br><br><i>'Value' refers to the importance, worth, or usefulness of receiving abortion-related care.</i> | At which level(s) did the study report on the outcome 'value of abortion-related care': micro, meso, or macro? |
| <b>Critical Outcome\$3B</b>                                                                                                | <b>Critical Outcome\$3C</b>                                                                                                                             | <b>Critical Outcome\$3D</b>                                               | <b>Critical Outcome\$4A</b>                                                                                                                                      | <b>Critical Outcome\$4B</b>                                                                                    |

|                                                                                                                                             |                                                               |                                                                                                                                           |                                                                                                         |                                                                                                                                      |
|---------------------------------------------------------------------------------------------------------------------------------------------|---------------------------------------------------------------|-------------------------------------------------------------------------------------------------------------------------------------------|---------------------------------------------------------------------------------------------------------|--------------------------------------------------------------------------------------------------------------------------------------|
| In the author's words, include the text describing the definition and/or methodology used for the outcome 'value of abortion-related care.' | Report all outcome data for 'value of abortion-related care.' | Did the study report on the outcome 'abortion-related stigma?'<br><br><i>This includes abortion-related discrimination and exclusion.</i> | At which level(s) did the study report on the outcome 'abortion-related stigma': micro, meso, or macro? | In the author's words, include the text describing the definition and/or methodology used for the outcome 'abortion-related stigma.' |
| <b>Critical Outcome\$4C</b>                                                                                                                 | <b>Critical Outcome\$4D</b>                                   | <b>Secondary Outcome\$1A</b>                                                                                                              | <b>Secondary Outcome\$1B</b>                                                                            | <b>Secondary Outcome\$1C</b>                                                                                                         |



|                                                        |                                                                                                                          |                                   |                              |                                                                      |
|--------------------------------------------------------|--------------------------------------------------------------------------------------------------------------------------|-----------------------------------|------------------------------|----------------------------------------------------------------------|
| Report all outcome data for 'abortion-related stigma.' | What other economic-related aims and outcomes were described or measured? Give details. Mark measured outcomes with (o). | What was the design of the study? | Give details of answer above | What type of data were presented in the evaluation findings/results? |
| <b>Secondary Outcome\$1D</b>                           | <b>Additional Aims/Outcomes</b>                                                                                          | <b>Study Type\$1</b>              | <b>Study Type\$2</b>         | <b>Data Type</b>                                                     |

In what context was the study conducted? Give details (e.g. legal status of abortion, culture, gender norms). Include any notes you think are relevant

| <b>Context</b> | <b>Notes</b> | <b>Notes 2<br/>(continued)</b> | <b>Notes 3<br/>(continued)</b> |
|----------------|--------------|--------------------------------|--------------------------------|
|----------------|--------------|--------------------------------|--------------------------------|
