# Supplementary material for: Economics of abortion: a scoping review protocol
Source: PubMed Central journal article supplement — BMJ Open. 2019 Jul 30;9(7):e029939. doi: 10.1136/bmjopen-2019-029939 (PMC6678010; doi:10.1136/bmjopen-2019-029939), 2019-07-30
Supplement: bmjopen-2019-029939supp002.pdf [file bmjopen-2019-029939supp002.pdf]

## Codebook

| Variable                | Question and instruction                                                                                                                                                                                                                                                               | Response options                                                                 |
|-------------------------|----------------------------------------------------------------------------------------------------------------------------------------------------------------------------------------------------------------------------------------------------------------------------------------|----------------------------------------------------------------------------------|
| Reviewer                | State your initials                                                                                                                                                                                                                                                                    | BM<br>CP<br>EC<br>EZ<br>SL<br>YR                                                 |
| Study ID                | Number assigned to each article/study (e.g., 001, 002)                                                                                                                                                                                                                                 | #                                                                                |
| Author                  | First author's surname                                                                                                                                                                                                                                                                 | Text                                                                             |
| Study Name              | Write the full name of the study or article.                                                                                                                                                                                                                                           | Text                                                                             |
| Publication Date        | Year of publication                                                                                                                                                                                                                                                                    | #                                                                                |
| Exclusion Criteria      | State the exclusion criteria for the study, or state "none."<br><br><i>If study meets exclusion criteria, end data extraction.</i>                                                                                                                                                     | Text                                                                             |
| Inclusion Criteria      | Does this study meet all inclusion criteria? Check PICOTS, language, year, and publication type (peer-review journal article or NBER working paper). If all criteria are met, state "all."<br><br><i>If all of the inclusion criteria are not met, return to "exclusion criteria."</i> | All                                                                              |
| Publication Type\$1     | Type of publication                                                                                                                                                                                                                                                                    | 1 = Peer-reviewed journal article<br>2 = NBER working paper<br>3 = Other         |
| Publication Type\$2     | If PubTyp = 3, give details.                                                                                                                                                                                                                                                           | Text<br>99 = not applicable                                                      |
| Other Publications      | Detail any other publications linked to the study (e.g. papers describing methods, additional analyses)                                                                                                                                                                                | Text                                                                             |
| First Author's Sex      | Indicate if the first author's first name suggests whether the author is a man or a woman. When the name could be unisex (e.g. Sam, Alex), is an initial, or is unclear to which sex it belongs, mark option 3.                                                                        | 1 = Woman<br>2 = Man<br>3 = Unclear                                              |
| Language of publication |                                                                                                                                                                                                                                                                                        | 1 = English<br>2 = French<br>3 = German<br>4 = Dutch<br>5 = Spanish<br>6 = Other |

| Variable                          | Question and instruction                                                                                                                      | Response options                                                                                                                                                                                                                                                                                                                                                                                                |
|-----------------------------------|-----------------------------------------------------------------------------------------------------------------------------------------------|-----------------------------------------------------------------------------------------------------------------------------------------------------------------------------------------------------------------------------------------------------------------------------------------------------------------------------------------------------------------------------------------------------------------|
| Country                           | List all countries in which the study was conducted                                                                                           | Text                                                                                                                                                                                                                                                                                                                                                                                                            |
| Country Income Group <sup>1</sup> | Country(ies) income group                                                                                                                     | 1 = Low<br>2 = Lower-middle<br>3 = Upper-middle<br>4 = High<br>5 = Multiple                                                                                                                                                                                                                                                                                                                                     |
| World Region <sup>2</sup>         | World region(s)                                                                                                                               | 1 = Africa<br>2 = Asia<br>3 = Europe<br>4 = Latin America and the Caribbean<br>5 = Northern America<br>6 = Oceania<br>7 = Multiple                                                                                                                                                                                                                                                                              |
| Study objective                   | State the primary or main objective(s) or aim(s) of the study                                                                                 | Text                                                                                                                                                                                                                                                                                                                                                                                                            |
| Geographic Level\$1               | At which geographical level did the study occur?                                                                                              | 1 = National<br>2 = Sub-national (e.g., region, state, county, district, whole city)<br>3 = Local (e.g., village, neighborhood)<br>4 = Health facility<br>5 = Other<br>98 = Unclear/not specified                                                                                                                                                                                                               |
| Geographic Level\$2               | Give specific detail for previous response (e.g. Santillana district (17 villages, 6158 inhabitants). Provide name if only one location unit. | Text<br>99 = if GeoLv1\$1 = 98                                                                                                                                                                                                                                                                                                                                                                                  |
| Study Population\$1               | What was the main identifying characteristic of the population/group/stratum the study targeted?                                              | 1 = Ethnic (or race)<br>2 = National<br>3 = Religion<br>4 = Language<br>5 = Indigenous, tribal, or caste-based<br>6 = Geographical location (e.g. urban/rural, region, facility)<br>7 = Socio-economic<br>8 = Age (e.g. adolescents)<br>9 = Status as abortion seeker<br>10 = Multiple answers from list<br>11 = Other, specify<br>12 = Abortion providers<br>98 = Unclear/not specified<br>99 = Not applicable |
| Study Population\$2               | Give specific detail for previous response (e.g., Hispanic American;                                                                          | Text                                                                                                                                                                                                                                                                                                                                                                                                            |

<sup>1</sup> World Bank Atlas method groupings of countries by income:

<https://datahelpdesk.worldbank.org/knowledgebase/articles/906519>

<sup>2</sup> WHO region groupings: Africa, Asia, Europe, Latin America and the Caribbean, Northern America, Oceania:

<https://unstats.un.org/unsd/methodology/m49/>

| Variable             | Question and instruction                                                                                                                                                              | Response options                                                                                                        |
|----------------------|---------------------------------------------------------------------------------------------------------------------------------------------------------------------------------------|-------------------------------------------------------------------------------------------------------------------------|
|                      | urban poor; Muslim population).<br>Use author's words (with quotation marks)                                                                                                          |                                                                                                                         |
| Critical Outcome\$1A | Did the study report on the outcome 'costs of abortion-related care?'<br><br><i>'Costs' refer to the amount paid to obtain abortion-related care.</i>                                 | 0 = No --> go to Critical Outcome\$2A<br>1 = Yes<br>98 = Unclear/not specified                                          |
| Critical Outcome\$1B | At which level(s) did the study report on the outcome 'costs of abortion-related care': micro, meso, macro                                                                            | 1 = Micro<br>2 = Meso<br>3 = Macro<br>4 = Micro and meso<br>5 = Meso and macro<br>6 = Micro and macro<br>7 = All levels |
| Critical Outcome\$1C | In the author's words, include the text describing the definition and/or methodology used for the outcome 'costs of abortion-related care.'                                           | Text<br>98 = Unclear/not specified                                                                                      |
| Critical Outcome\$1D | Report all outcome data for 'costs of abortion-related care.'                                                                                                                         | Text<br>98 = Unclear/not specified                                                                                      |
| Critical Outcome\$2A | Did the study report on the outcome 'economic impacts of abortion-related care?'<br><br><i>'Economic impacts' refer to the economic effect or influence of abortion-related care.</i> | 0 = No --> go to Critical Outcome\$3A<br>1 = Yes<br>98 = Unclear/not specified                                          |
| Critical Outcome\$2B | At which level(s) did the study report on the outcome 'economic impacts of abortion-related care': micro, meso, macro                                                                 | 1 = Micro<br>2 = Meso<br>3 = Macro<br>4 = Micro and meso<br>5 = Meso and macro<br>6 = Micro and macro<br>7 = All levels |
| Critical Outcome\$2C | In the author's words, include the text describing the definition and/or methodology used for the outcome 'economic impacts of abortion-related care.'                                | Text<br>98 = Unclear/not specified                                                                                      |
| Critical Outcome\$2D | Report all outcome data for 'economic impacts of abortion-related care.'                                                                                                              | Text<br>98 = Unclear/not specified                                                                                      |
| Critical Outcome\$3A | Did the study report on the outcome 'economic benefits of abortion-related care?'                                                                                                     | 0 = No --> go to Critical Outcome\$4A<br>1 = Yes<br>98 = Unclear/not specified                                          |

| Variable              | Question and instruction                                                                                                                                                       | Response options                                                                                                        |
|-----------------------|--------------------------------------------------------------------------------------------------------------------------------------------------------------------------------|-------------------------------------------------------------------------------------------------------------------------|
|                       | <i>'Economic benefits' refer to the advantages or profits gained from receiving abortion-related care.</i>                                                                     |                                                                                                                         |
| Critical Outcome\$3B  | At which level(s) did the study report on the outcome 'economic benefits of abortion-related care': micro, meso, macro                                                         | 1 = Micro<br>2 = Meso<br>3 = Macro<br>4 = Micro and meso<br>5 = Meso and macro<br>6 = Micro and macro<br>7 = All levels |
| Critical Outcome\$3C  | In the author's words, include the text describing the definition and/or methodology used for the outcome 'economic benefits of abortion-related care.'                        | Text<br>98 = unclear/not specified                                                                                      |
| Critical Outcome\$3D  | Report all outcome data for 'economic benefits of abortion-related care.'                                                                                                      | Text<br>98 = unclear/not specified                                                                                      |
| Critical Outcome\$4A  | Did the study report on the outcome 'value of abortion-related care?'<br><br><i>'Value' refers to the importance, worth, or usefulness of receiving abortion-related care.</i> | 0 = No --> go to Secondary Outcome\$1A<br>1 = Yes<br>98 = Unclear/not specified                                         |
| Critical Outcome\$4B  | At which level(s) did the study report on the outcome 'value of abortion-related care': micro, meso, macro                                                                     | 1 = Micro<br>2 = Meso<br>3 = Macro<br>4 = Micro and meso<br>5 = Meso and macro<br>6 = Micro and macro<br>7 = All levels |
| Critical Outcome\$4C  | In the author's words, include the text describing the definition and/or methodology used for the outcome 'value of abortion-related care.'                                    | Text<br>98 = unclear/not specified                                                                                      |
| Critical Outcome\$4D  | Report all outcome data for 'value of abortion-related care.'                                                                                                                  | Text<br>98 = unclear/not specified                                                                                      |
| Secondary Outcome\$1A | Did the study report on the outcome 'abortion-related stigma?'<br><br><i>This includes abortion-related discrimination and exclusion.</i>                                      | 0 = No --> go to Secondary Outcome\$2A<br>1 = Yes<br>98 = Unclear/not specified                                         |
| Secondary Outcome\$1B | At which level(s) did the study report on the outcome 'abortion-related stigma': micro, meso, macro                                                                            | 1 = Micro<br>2 = Meso<br>3 = Macro<br>4 = Micro and meso<br>5 = Meso and macro                                          |

| Variable                 | Question and instruction                                                                                                             | Response options                                                                                                                                                                                                                                                                                                                          |
|--------------------------|--------------------------------------------------------------------------------------------------------------------------------------|-------------------------------------------------------------------------------------------------------------------------------------------------------------------------------------------------------------------------------------------------------------------------------------------------------------------------------------------|
|                          |                                                                                                                                      | 6 = Micro and macro<br>7 = All levels<br>98 = unclear/not specified                                                                                                                                                                                                                                                                       |
| Secondary Outcome\$1C    | In the author's words, include the text describing the definition and/or methodology used for the outcome 'abortion-related stigma.' | Text<br>98 = unclear/not specified                                                                                                                                                                                                                                                                                                        |
| Secondary Outcome\$1D    | Report all outcome data for 'abortion-related stigma.'                                                                               | Text<br>98 = unclear/not specified                                                                                                                                                                                                                                                                                                        |
| Additional Aims/Outcomes | What other aims and outcomes were described or measured? Give details. Mark measured outcomes with (o).                              | Text                                                                                                                                                                                                                                                                                                                                      |
| Study Type\$1            | What was the design of the study?                                                                                                    | 1 = Randomized controlled trial<br>2 = Controlled clinical trial<br>3 = Cohort analytic (two groups pre + post)<br>4 = Case-control<br>5 = Cohort (one group pre + post (before and after))<br>6 = Interrupted time series<br>7 = Qualitative<br>8 = Mixed methods<br>9 = Other<br>10 = Regression analysis<br>98 = Unclear/not specified |
| Study Type\$2            | Give details of answer above                                                                                                         | Text<br>99 = Not applicable                                                                                                                                                                                                                                                                                                               |
| Data Type                | What type of data was presented in the evaluation findings/results?                                                                  | 1 = Quantitative<br>2 = Qualitative<br>3 = Both                                                                                                                                                                                                                                                                                           |
| Context                  | In what context was the study conducted? Give details (e.g. legal status of abortion, culture, gender norms, stigma).                | Text                                                                                                                                                                                                                                                                                                                                      |
| Notes                    | Include any notes you think are relevant                                                                                             | Text                                                                                                                                                                                                                                                                                                                                      |
